# Supplementary material
Source: PubMed Central journal article supplement (PMC6728221)

**Supplemental**

**BCMA Peptide-specific CTL  
(HLA-A2<sup>+</sup> Donor 1)**

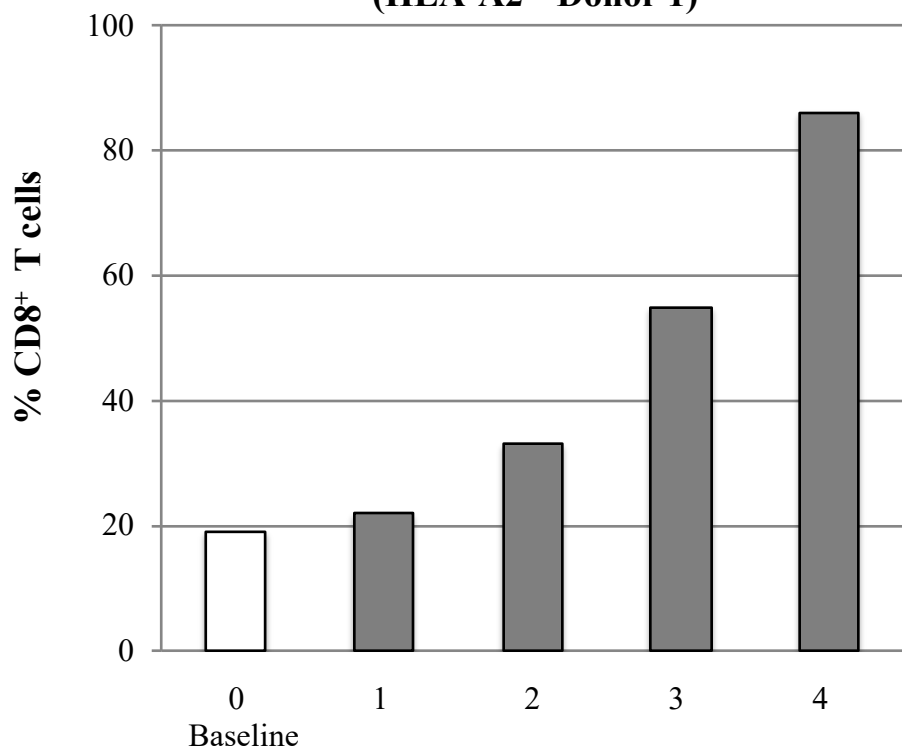

**BCMA Peptide-specific CTL  
(HLA-A2<sup>+</sup> Donor 2)**

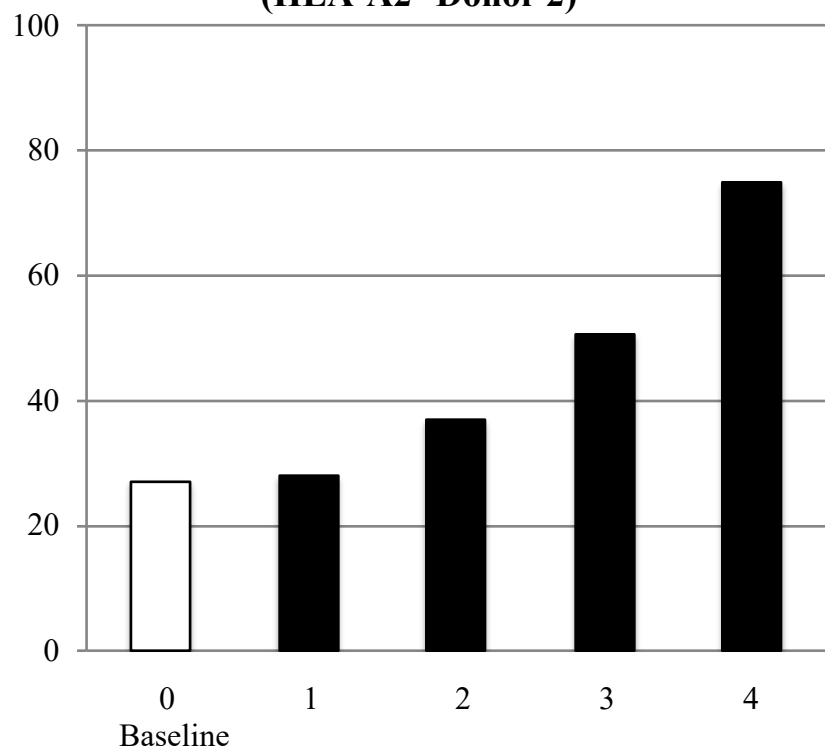

**Number of Peptide Stimulation with Heteroclitic Peptide BCMA<sub>72-80</sub>**

**BCMA Peptide-specific CTL  
(HLA-A2<sup>+</sup> Donor 1)**

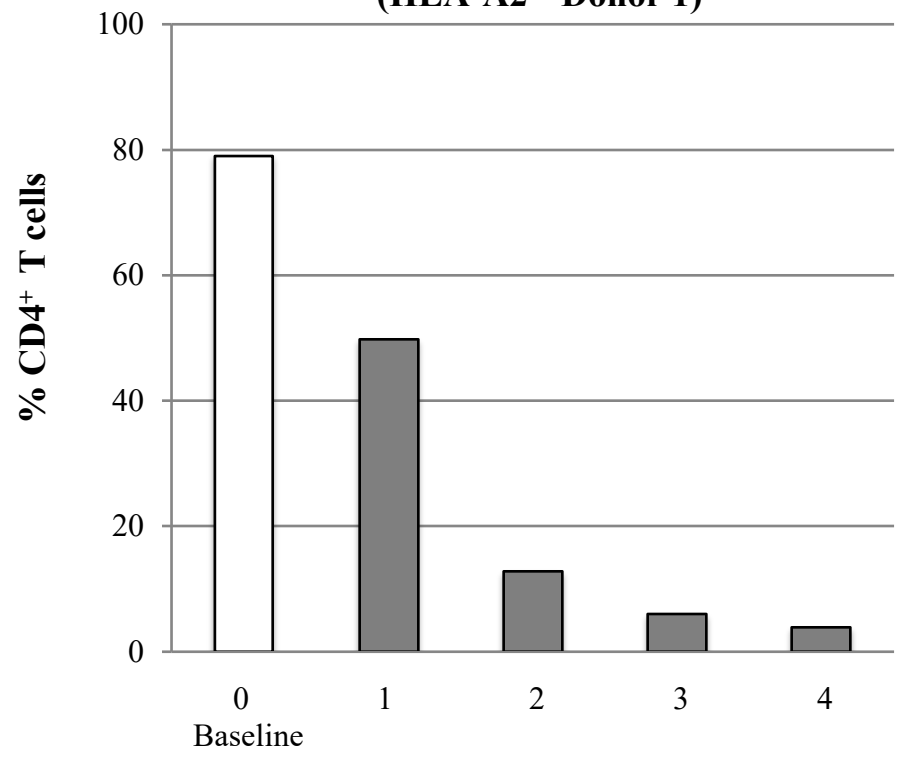

**BCMA Peptide-specific CTL  
(HLA-A2<sup>+</sup> Donor 2)**

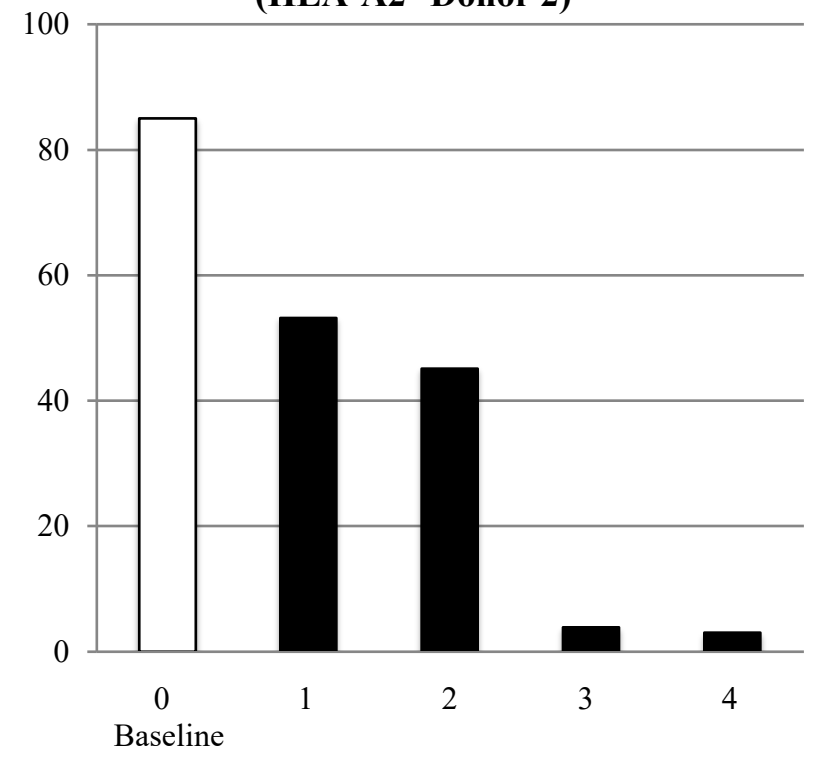

**Number of Peptide Stimulation with Heteroclitic Peptide BCMA<sub>72-80</sub>**

**BCMA Antibody: Clone ID**

**ANC3B1**

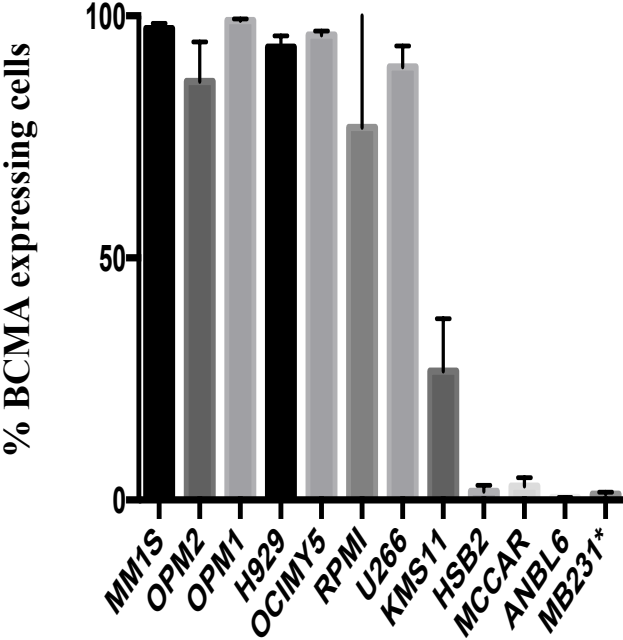

**VICKY1**

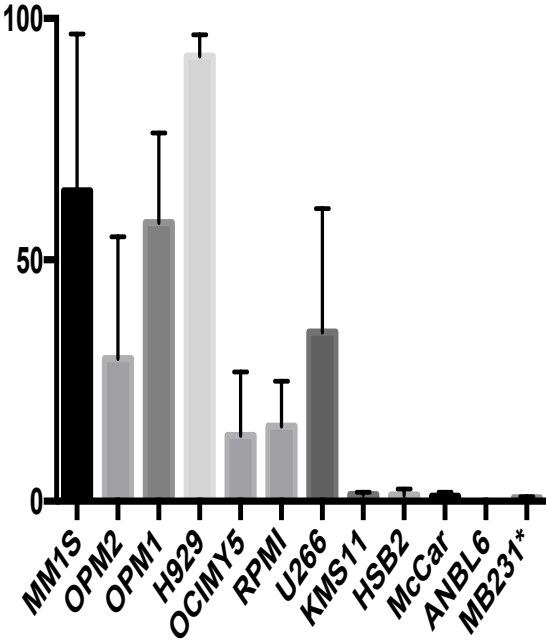

**19F2**

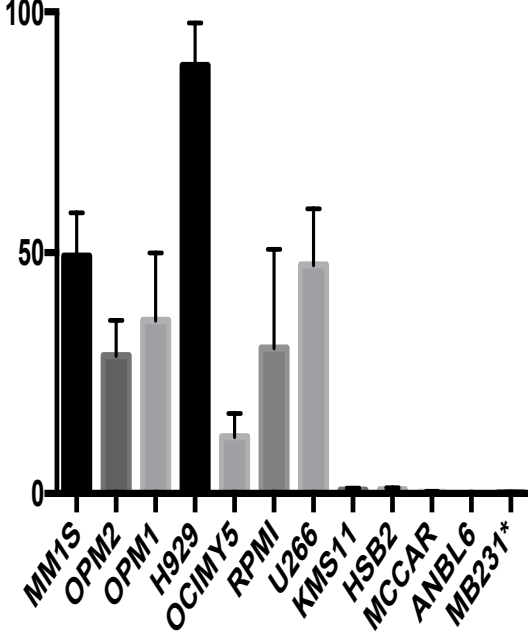

**Multiple Myeloma Cell Lines Stained**

**Post- 4 cycles of stimulation with BCMA peptide**

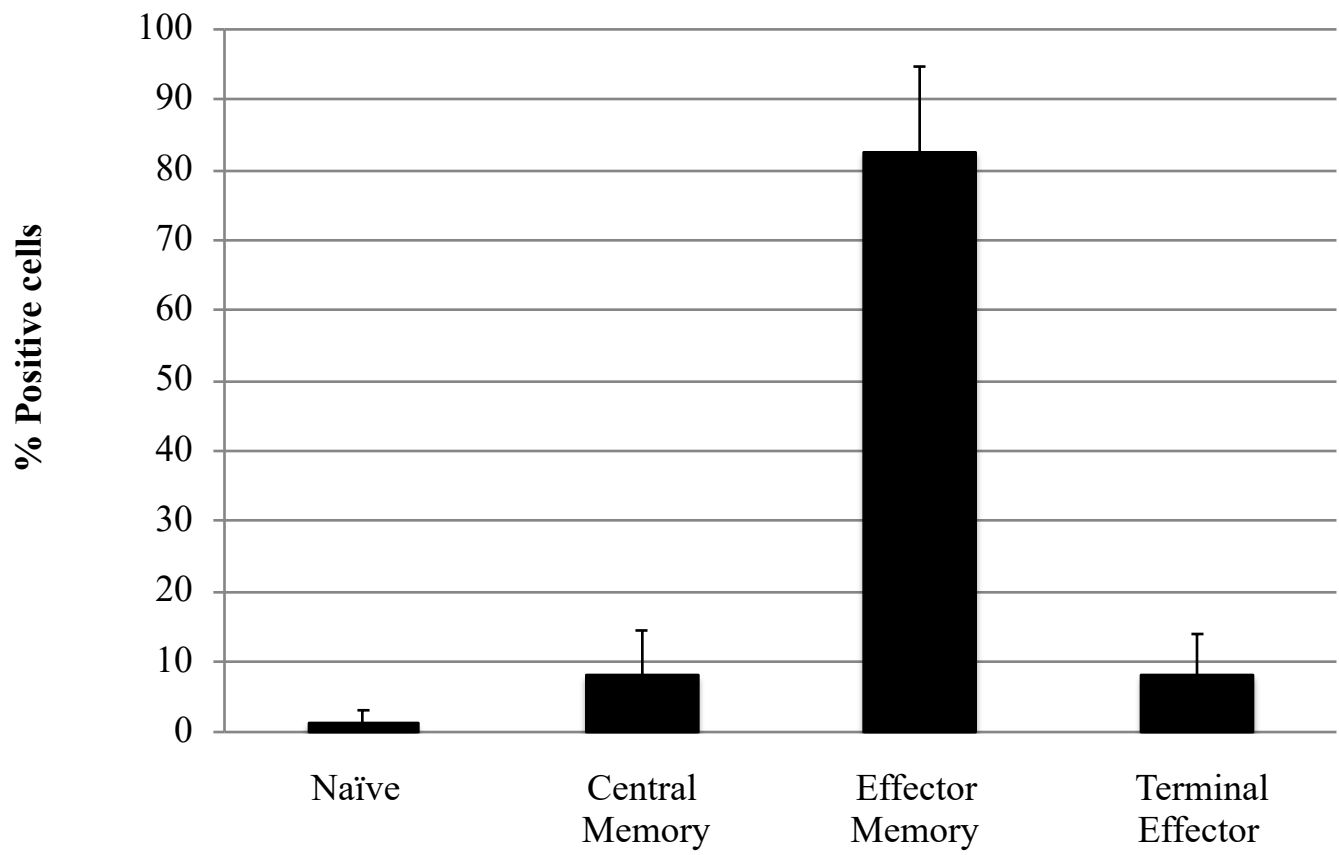

**CD3<sup>+</sup>CD8<sup>+</sup> T cells Gated**

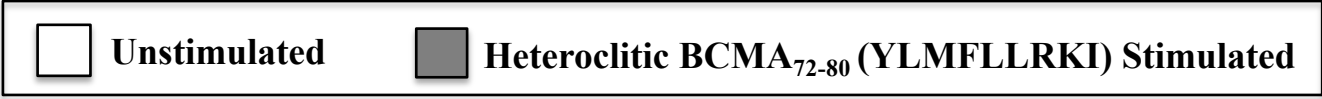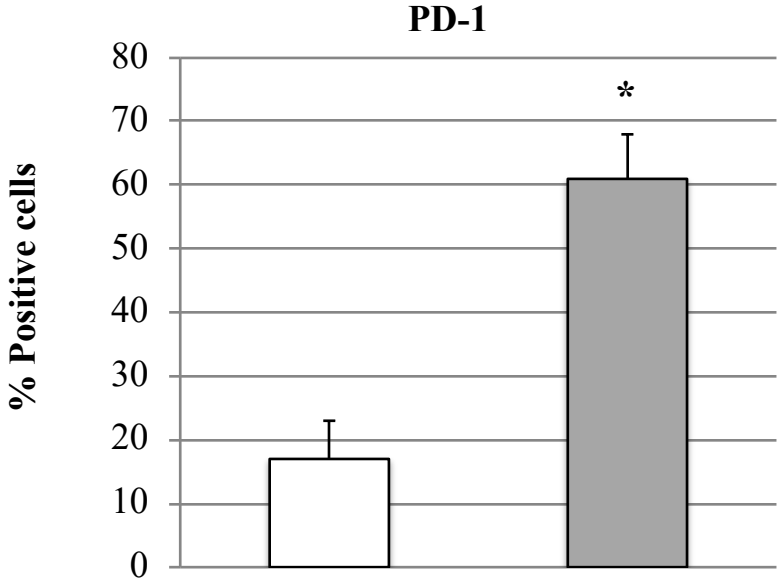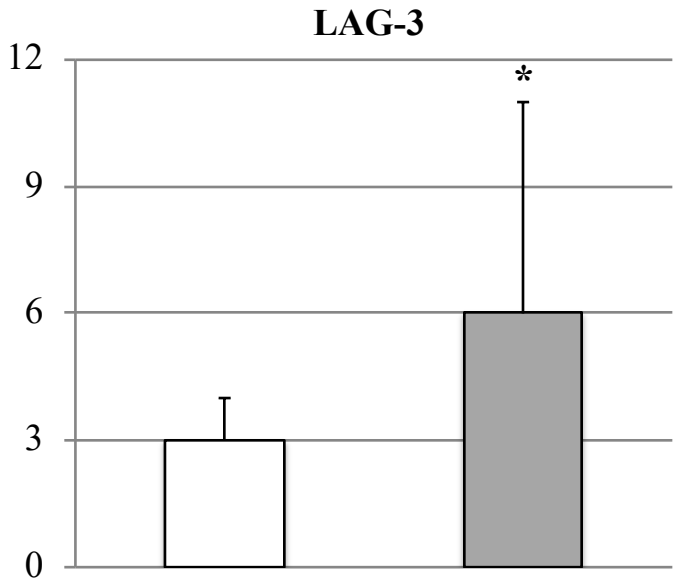

Supplement: NIHMS1034857-supplement-1.pdf [file NIHMS1034857-supplement-1.pdf]
